# Supplementary material for: A SOC1-like gene MtSOC1a promotes flowering and primary stem elongation in Medicago
Source: PubMed Central journal article supplement (PMC6137972; doi:10.1093/jxb/ery284), 2018-07-26
Supplement: ery284_suppl_supplementary_figures_s1-s9_table_s1.pdf [file ery284_suppl_supplementary_figures_s1-s9_table_s1.pdf]

## Supplementary Data

**Jaudal et al (2018) A *SOC1-like* gene *MtSOC1a* promotes flowering and primary stem elongation in Medicago**

**A**

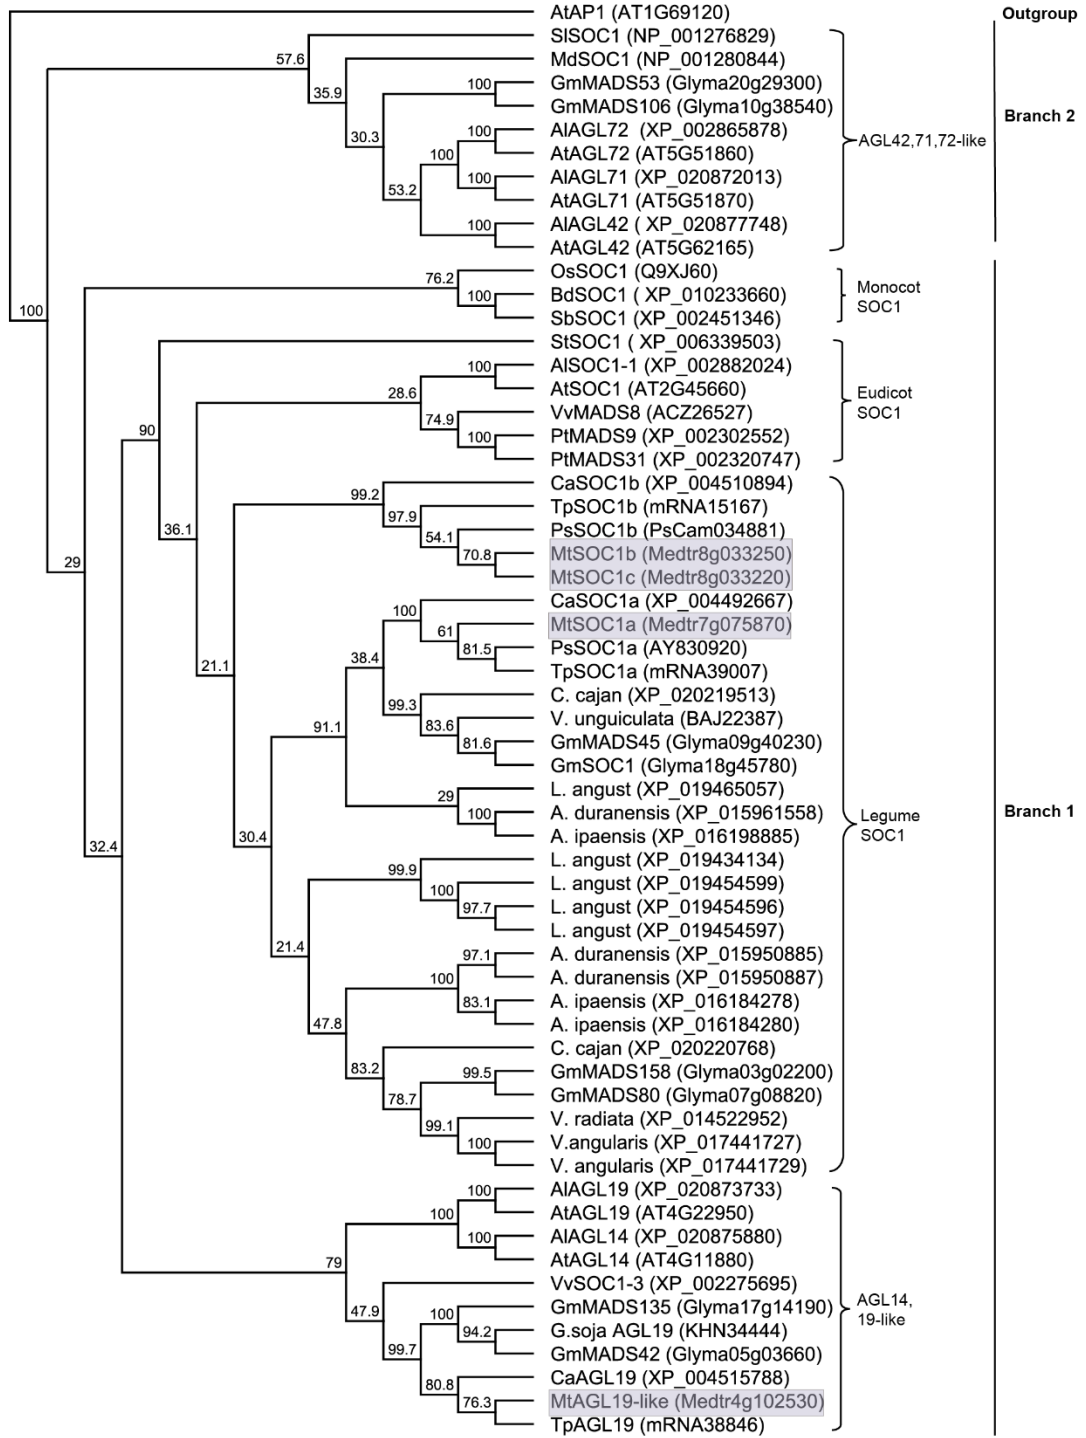

**B**

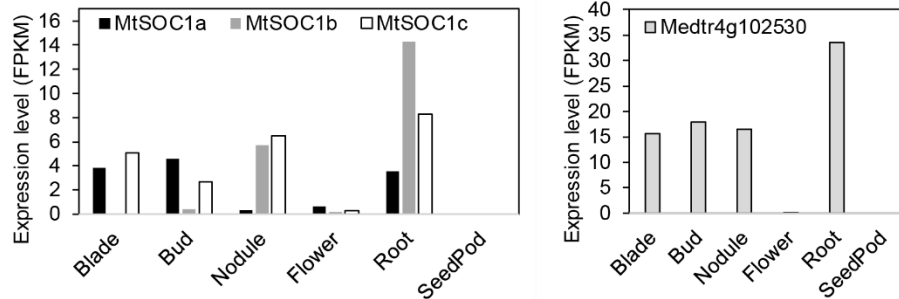

**Supplementary Fig. S1.** Phylogenetic analysis of TM3-like sequences and *in silico* analysis of normalised RNA Seq data of *MtSOC1* and *Medtr4g102530* genes. **(A)** A consensus phylogenetic tree of TM3-like sequences from Arabidopsis, temperate and tropical legumes, and other plants based on MIK domains and rooted on Arabidopsis APETALA1 (AtAP1). The tree was generated using the Neighbor-Joining (NJ) method via bootstrap resampling with support threshold of 10%. The numbers indicate the bootstrap values based on 1000 replicates. Overall branch numbering is from Dorca-Fornell *et al.* (2011). The four Medicago proteins are highlighted in grey. Al: *Arabidopsis lyrata*, At: *Arabidopsis thaliana*, *Arachis ipaensis* and *Arachis duranensis* (peanut ancestors), Bd: *Brachypodium distachyon*, Ca: *Cicer arietinum* (chick pea), Cj: *Cajanus cajan* (perennial legume), Gm: *Glycine max* (soybean), *Glycine soja* (wild soybean), *Lupinus angustifolius* (lupin), Md: *Malus domestica* (apple), Mt: *Medicago truncatula*, Os: *Oryza sativa* (rice), Ps: *Pisum sativum* (pea), Pt: *Populus trichocarpa* (black cottonwood), Sb: *Sorghum bicolor*, Sl: *Solanum lycopersicum* (tomato), St: *Solanum tuberosum* (potato), Tp: *Trifolium pratense* (red clover), *Vigna angularis* (Adzuki bean), *Vigna radiata* (mungbean), *Vigna unguiculata* (cowpea), Vv: *Vitis vinifera* (common grape vine). **(B)** Comparison of *MtSOC1* and *Medtr4g102530* gene expression in different tissues by *in silico* analysis of normalised RNA Seq data using the MedicagoMine *Medicago truncatula* genome sequence database.

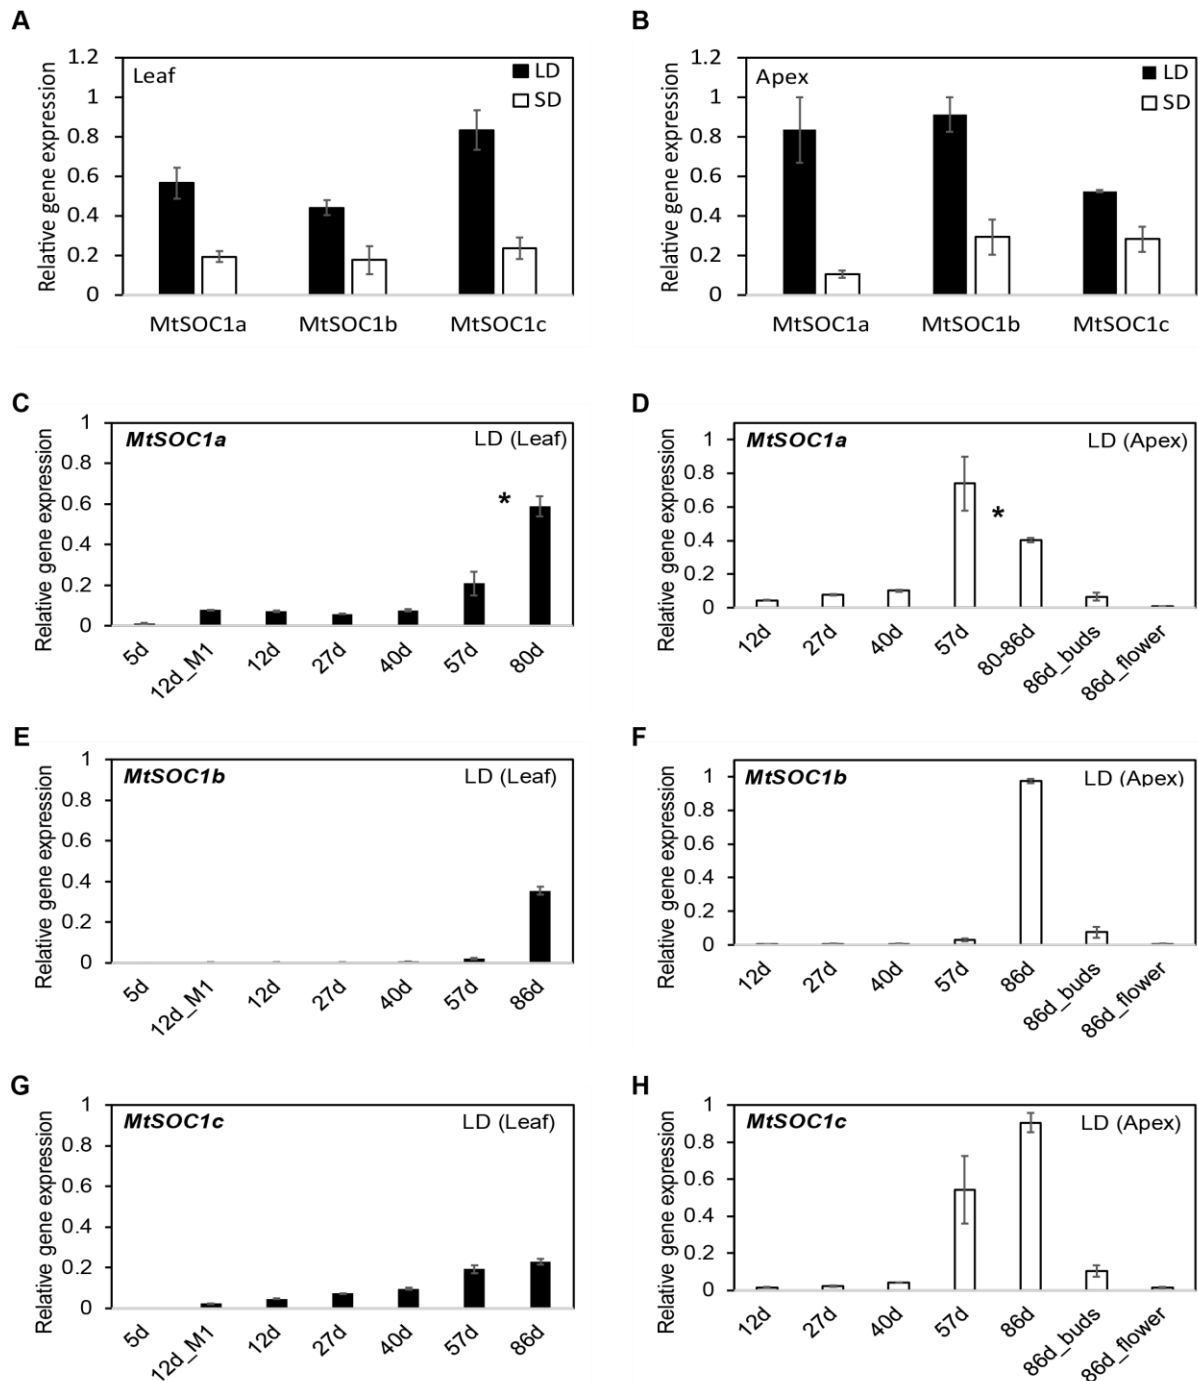

**Supplementary Fig. S2.** Expression of the three *MtSOC1* genes in *Medicago* wild type R108 plants under long day (LD) and short day (SD) photoperiods and during a developmental time course in LD. **(A-B)** Relative transcript abundance of *MtSOC1* genes in fully-expanded trifoliolate leaves **(A)** and uppermost apical buds **(B)** of 14 day-old wild type R108 seedlings under LD and SD photoperiods. **(C-H)** Relative gene expression levels of the three *MtSOC1* genes in leaves **(C, E, G)** and uppermost apical buds, flower buds or open flowers **(D, F, H)** in days after planting in LD. The \* in **(C-D)** indicate that the plants flowered with floral buds first visible at 69 days. Cotyledons were harvested at 5 days while monofoliolate leaves (M1) or

trifoliolate leaves were harvested at the remaining time points. Tissues in **(A-H)** were harvested two hours after dawn. Gene expression was determined using RT-qPCR and relative gene expression is shown as the mean  $\pm$  se of three biological replicates, which were normalized to *PP2A*. The data is presented relative to the highest value for a specific gene.

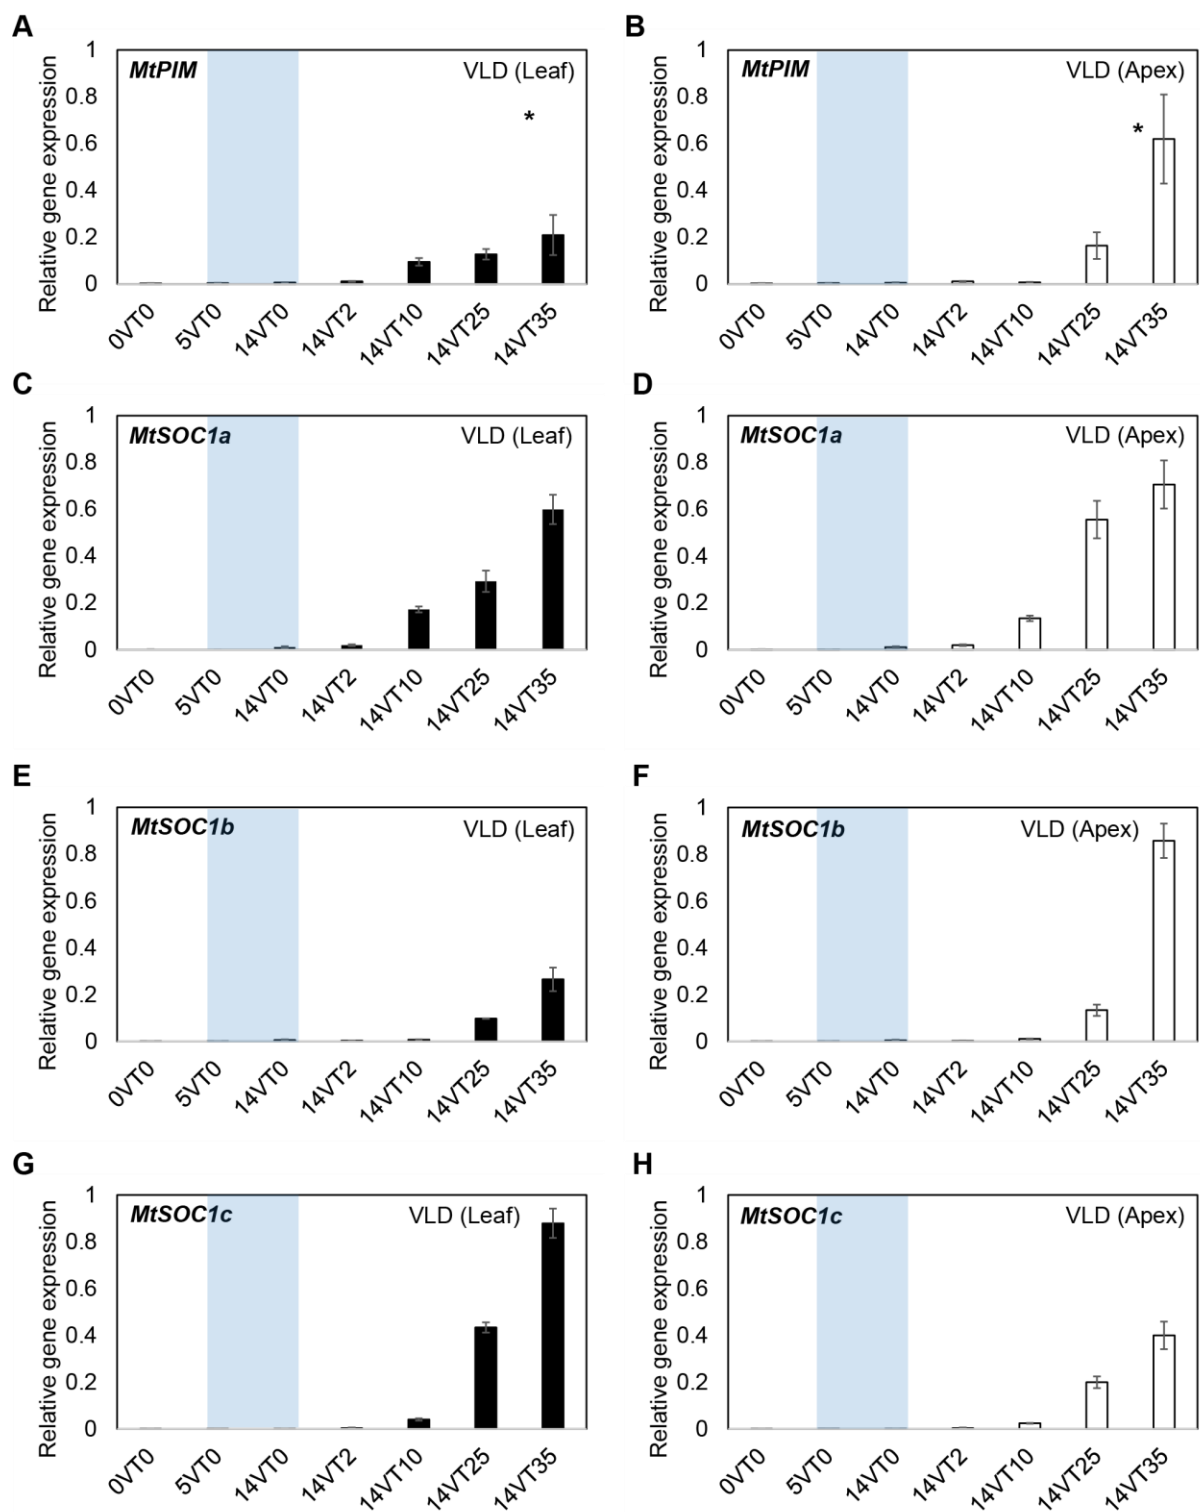

**Supplementary Fig. S3.** Expression of *MtPIM* and *MtSOC1* genes in a developmental time course in VLD by RT-qPCR. **(A-H)** Expression of *MtPIM* and *MtSOC1* genes in Medicago in a developmental time course in VLD. Relative gene expression levels of *MtPIM* and the three *MtSOC1* genes in whole seedlings, monofoliolate leaves or trifoliolate leaves **(A, C, E, G)** and

uppermost apical buds (**B, D, F, H**) before, during and after vernalisation are shown. After germination (0VT0), *Medicago* seeds were vernalised (shaded) by exposure to 14 days of cold (14V) at 4 °C in the dark, then planted in pots and transferred to warm (22 °C) LD conditions. The \* indicates that plants had flowered with floral buds first visible at 32 days (T32) after planting of the vernalised seeds in the warm (14VT32). Tissues were harvested two hours after dawn. Whole seedlings were used for 0VT0 to 14VT0, whole aerial parts for 14VT2, and monofoliolate leaves or trifoliolate leaves and uppermost apical buds for 14VT10 and onwards. The grey shading indicates the 14-day vernalisation treatment. Gene expression was determined using RT-qPCR and the data are shown as the mean  $\pm$  standard error (SE) of three biological replicates, which were normalized to *PP2A*. The data is presented relative to the highest value in all tissues for each gene.

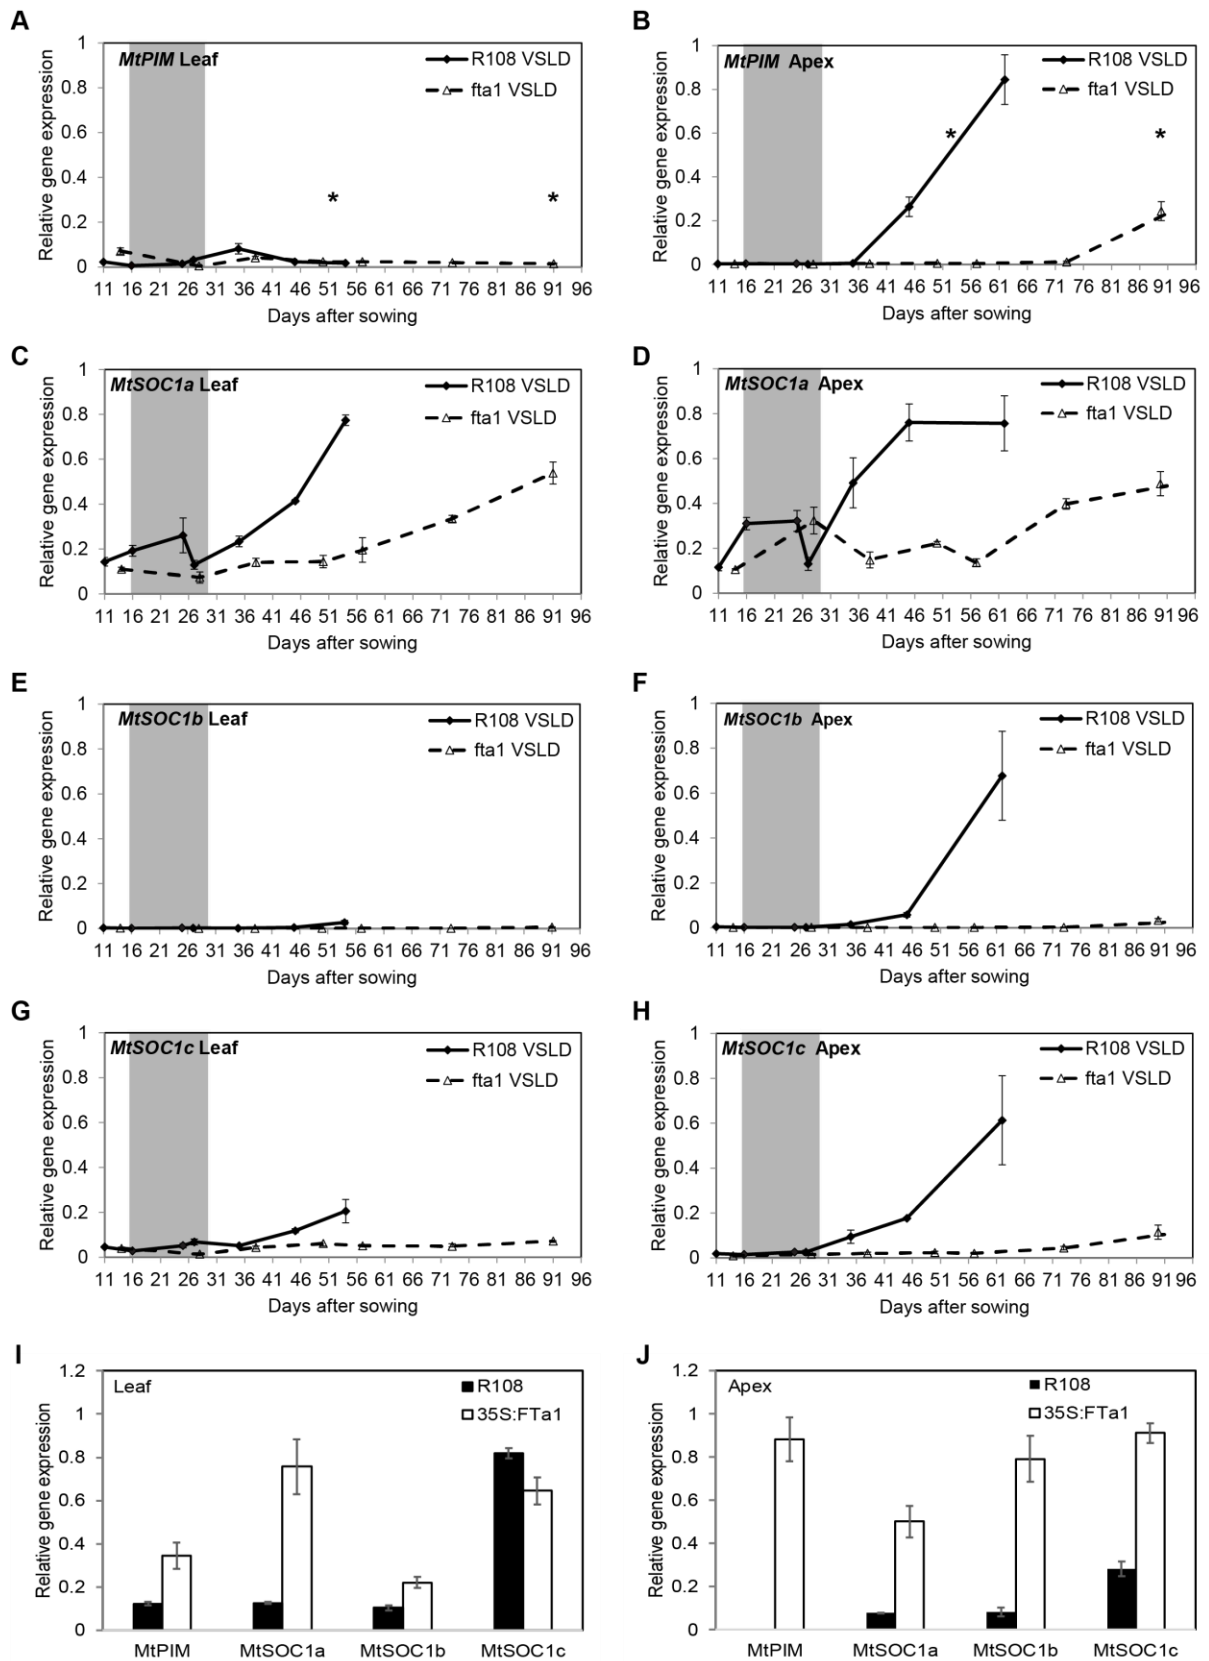

**Supplementary Fig. S4.** Expression of *MtPIM* and the three *MtSOC1* genes in *fta1*-null mutants and *35S:FTa1* transgenic Medicago R108 plants. (A-H) Comparison of expression of



*MtPIM* (**A-B**) and the three *MtSOC1* genes (**C-H**) in *Medicago* wild type R108 and mutant *ftal* plants in a developmental time course in LD after vernalisation of young seedlings (VSLD). Relative gene expression levels of *MtPIM* and the three *MtSOC1* genes in trifoliolate leaves (**A, C, E, G**) and uppermost shoot apices (**B, D, F, H**) in seedlings during the 14 day vernalisation treatment (shaded) and after transfer to warm LD conditions are shown. The \* shown in (**A-B**) indicate that plants had flowered with floral buds first visible on R108 plants at 52 days after planting and 91 days for the late-flowering *ftal* mutant. (**I-J**) Effect of ectopic expression of *FTal* on *MtPIM* and the three *MtSOC1* transcript levels in *35S:FTal* transgenic *Medicago* R108 plants in LD. Relative gene expression levels in trifoliolate leaves (**I**) and uppermost apical buds (**J**) of *35S:FTal* and wild type R108 14 day-old plants in LD are shown. Tissues were harvested at two hours after dawn (ZT2). Gene expression was determined using RT-qPCR and the data are shown as the mean  $\pm$  se of three biological replicates, which were normalized to *PP2A*. The data is presented relative to the highest value over both tissues for each gene.

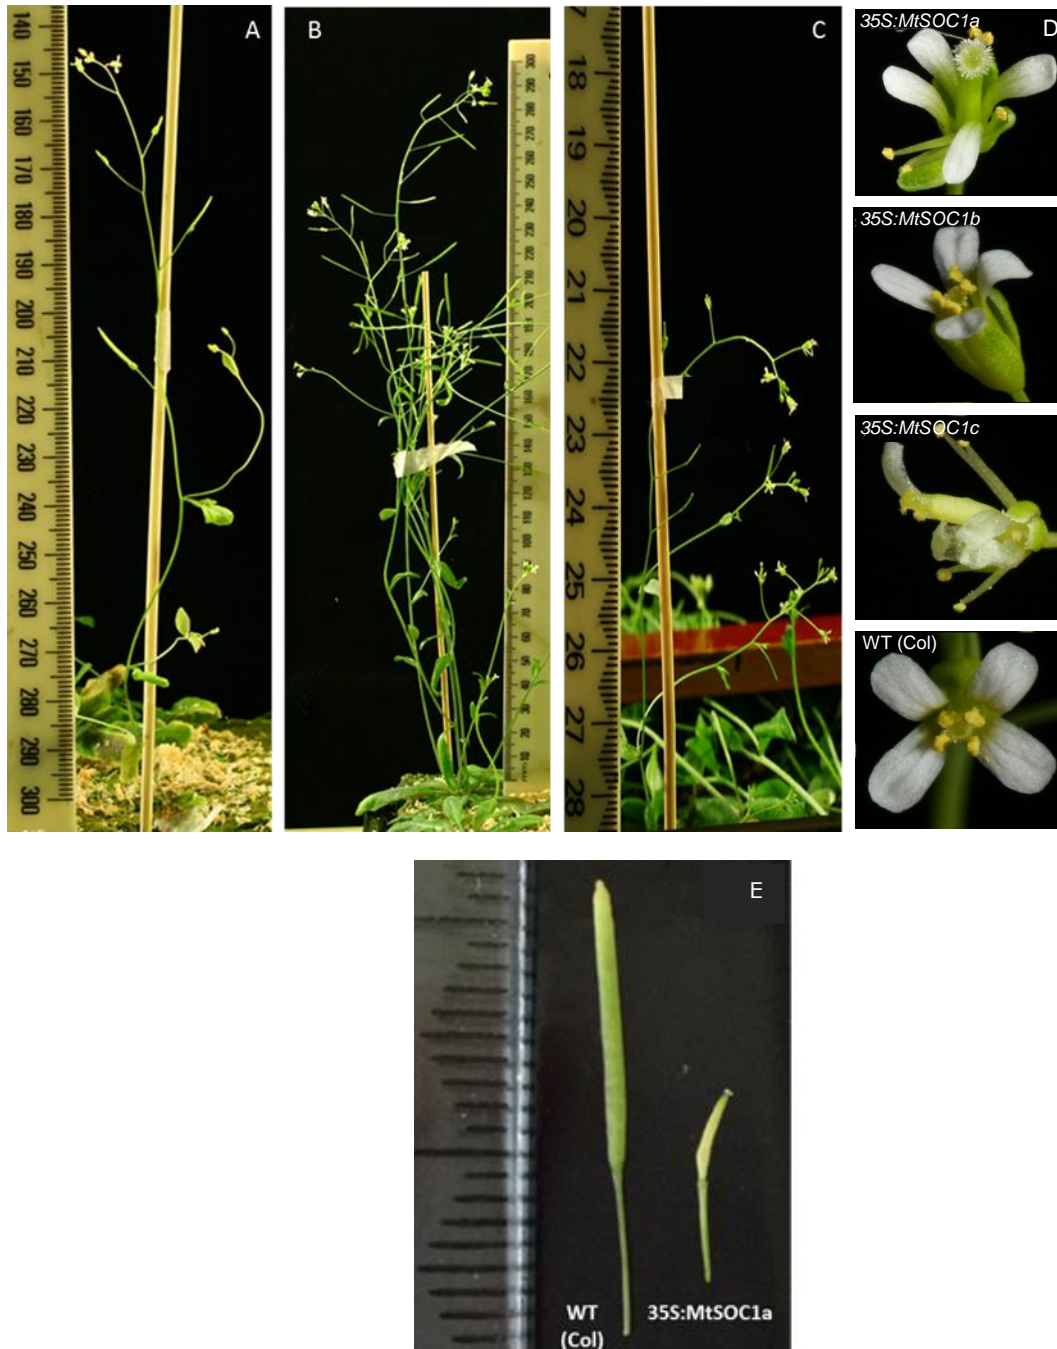

**Supplementary Fig. S5.** Plant, flower and silique architectures of transgenic Arabidopsis plants with *35S: MtSOC1* transgenes. (A-C) Photographs of *35S: MtSOC1a* (A), *35S: MtSOC1b* (B) and *35S: MtSOC1c* (C) transgenic plants. (D) Close-up photographs of flowers from *35S: MtSOC1a*, *35S: MtSOC1b* and *35S: MtSOC1c* transgenic plants and WT Col plants. (E) Photograph of siliques from WT Col and transgenic *35S: MtSOC1a* plants.

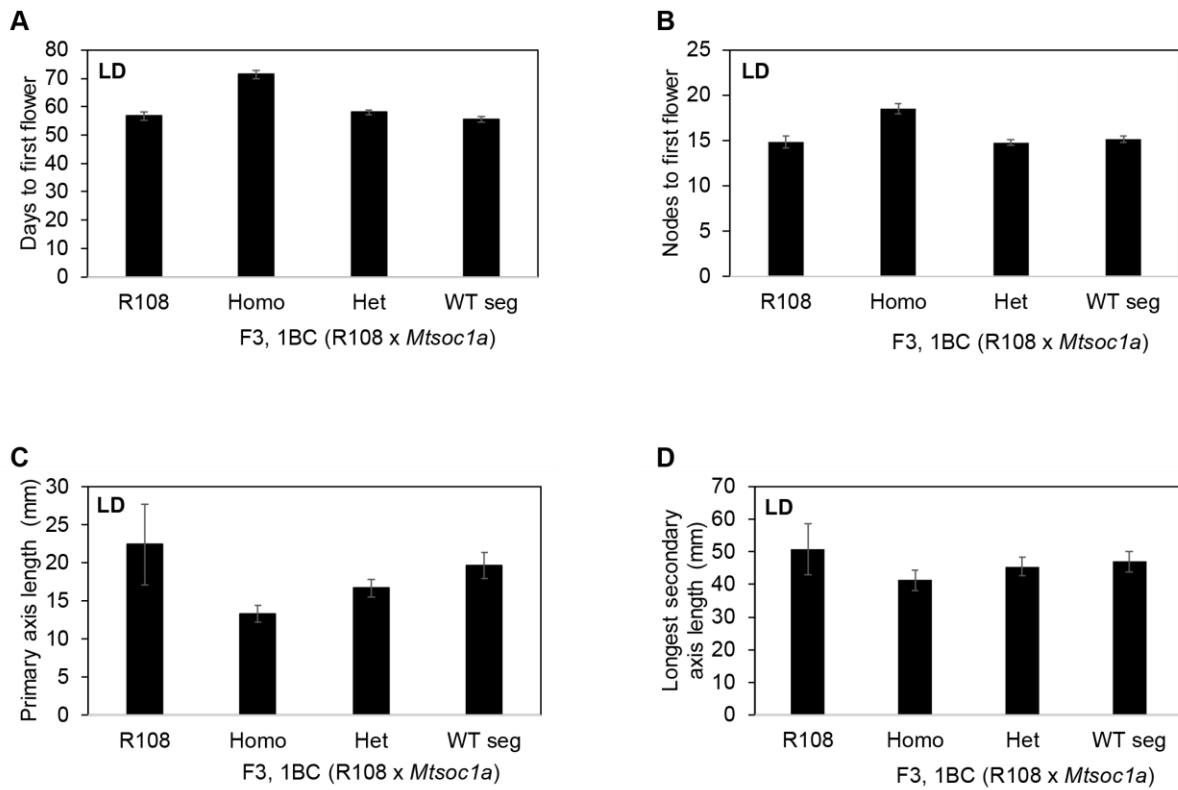

**Supplementary Fig. S6.** Flowering time and lengths of primary and secondary axes of a segregating population from a backcross of *Mtsoc1a* mutants to wild type R108 plants in LD. (A-B) Graphs showing the flowering time of R108 and F3 segregating population (R108 x *Mtsoc1a*) in LD scored in either days (A) or nodes to first flower (B). The mean  $\pm$  t.se (0.05) is presented (n = 11-73). (C-D) Lengths of primary axis (C) and longest secondary axis (D) of plants shown in (A-B) measured at 31 day-old and presented as the mean  $\pm$  t.se (0.05) (n=11-73).

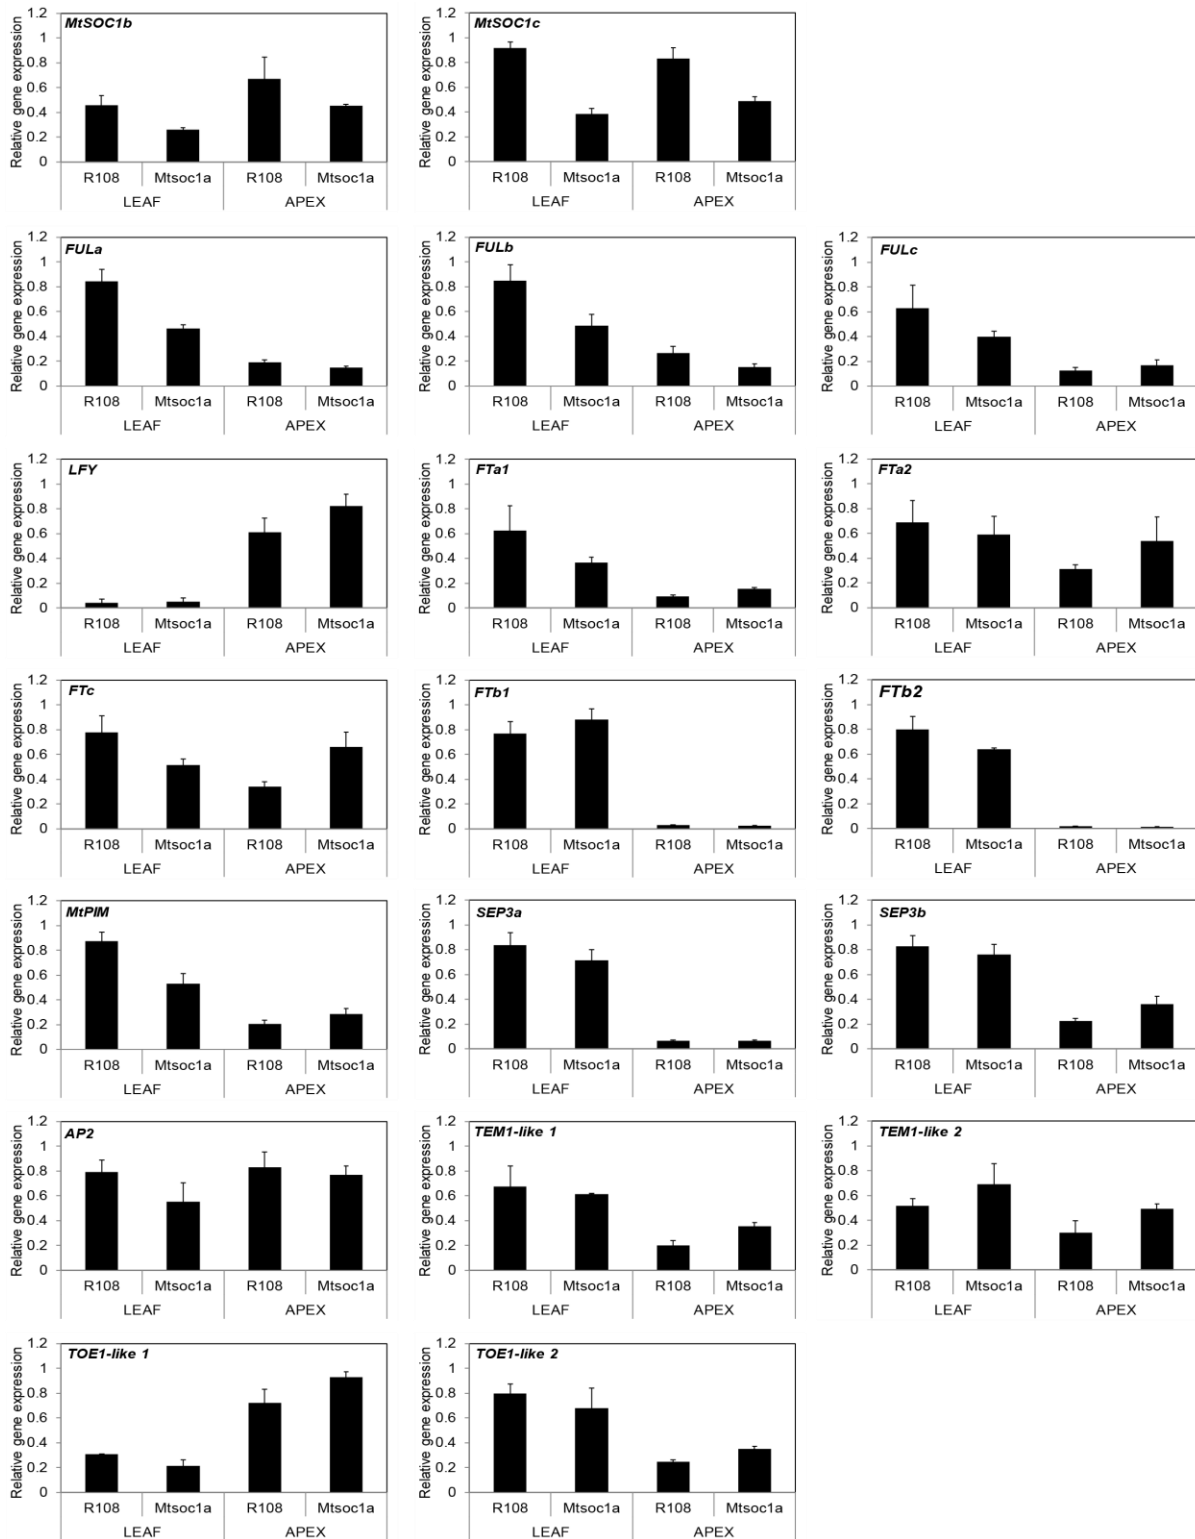

**Supplementary Fig. S7.** Gene expression of candidate flowering time and floral homeotic genes in the *Mtsoc1a* mutant. Relative transcript abundance was measured in the fully expanded trifoliolate leaves and uppermost apical buds of 14 day-old wild type R108 and *Mtsoc1a* homozygous seedlings grown in vernalised long day (VLD) photoperiods. Relative gene expression was measured by RT-qPCR with normalization to *PP2A*. Data are the mean

± se of three biological replicates and relative to the highest value for each of the genes analysed. Tissues were harvested 2 h after dawn.

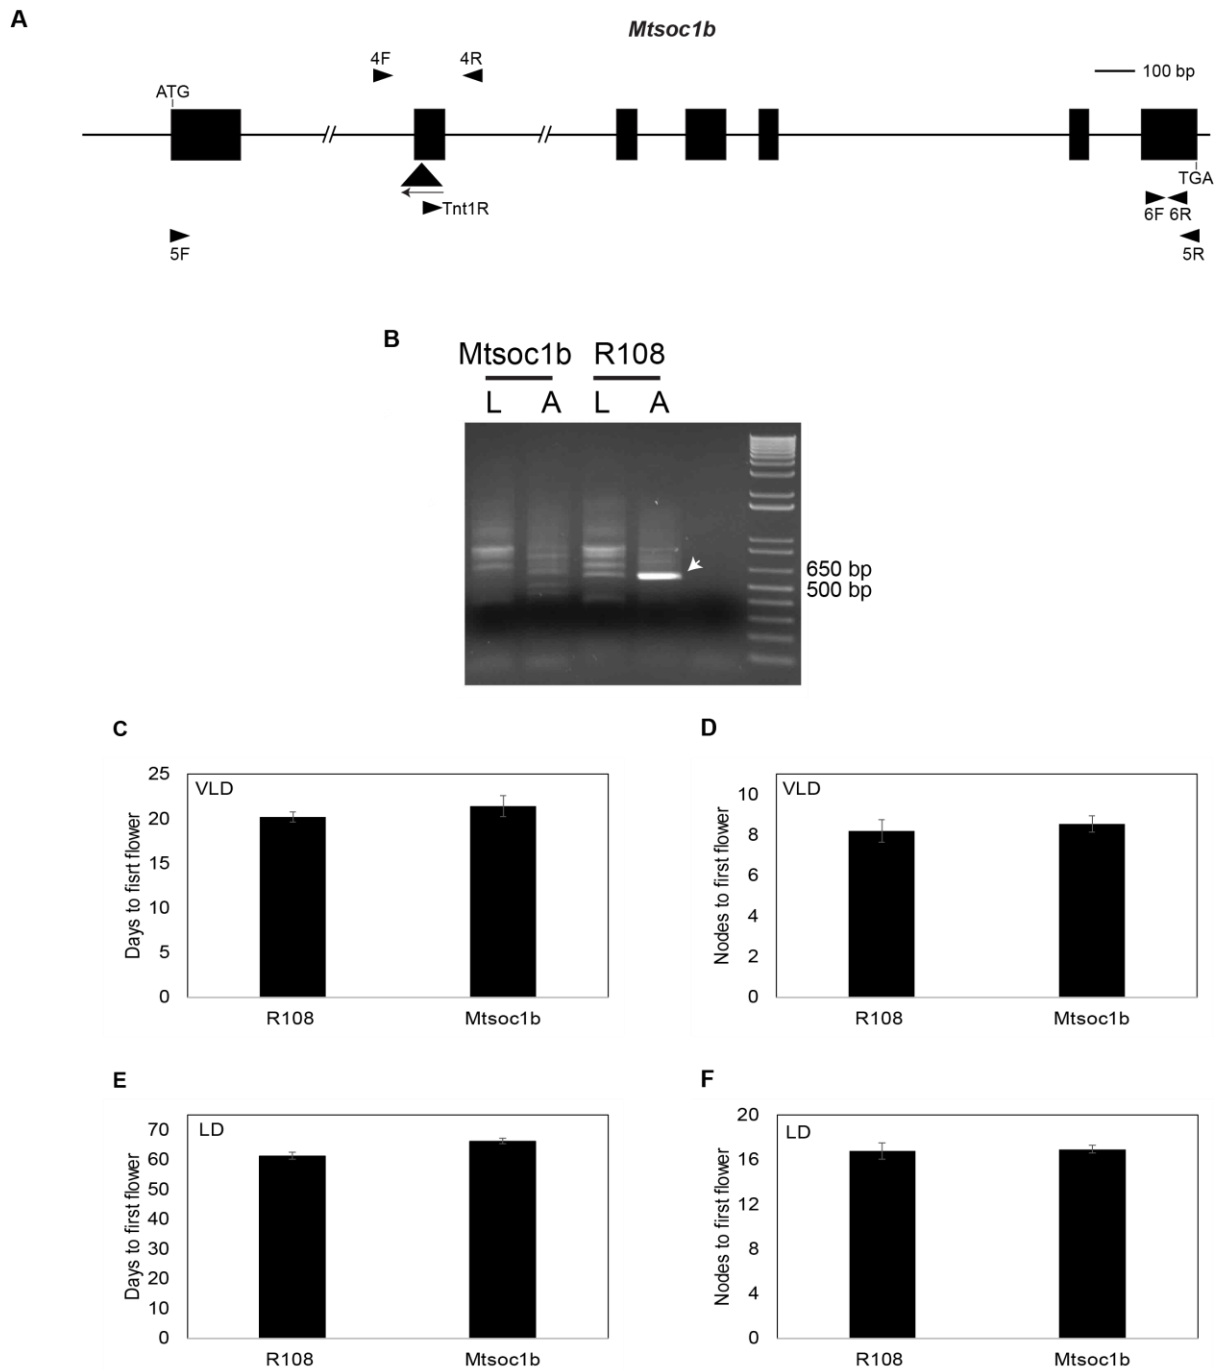

**Supplementary Fig. S8.** *Mtsoc1b Tnt1* mutants flowered at the same time as wild type R108. (A) Schematic diagram of the *MtSOC1b* gene and the position and orientation of *Tnt1* insertion in the *Mtsoc1b* mutant. Exons are shown as black boxes and introns as thin lines. A double line break indicates that the intron is larger than drawn. The arrowheads indicate the positions of primers. (B) Photograph of an agarose gel showing the presence of full-length cDNA (indicated by arrow) in wild type R108 but not in *Mtsoc1b* mutant plants. L: leaf; A: apex. (C-F) Graphs showing the flowering time of *Mtsoc1a* homozygous mutants as compared with wild type R108

scored in either days (C, E) or nodes to first flower (D, F) grown in VLD (C, D) and LD photoperiods (E, F). The mean  $\pm$  t.se (0.05) is presented (n = 9-28).

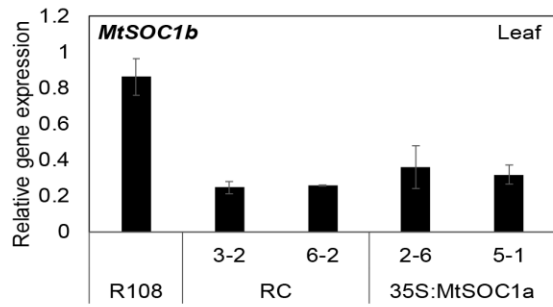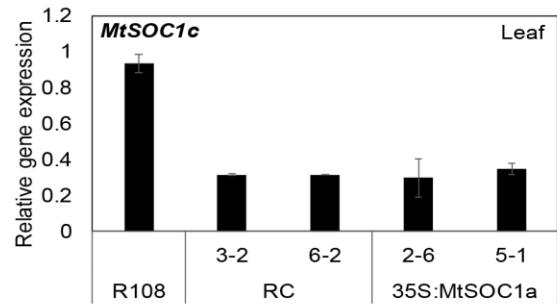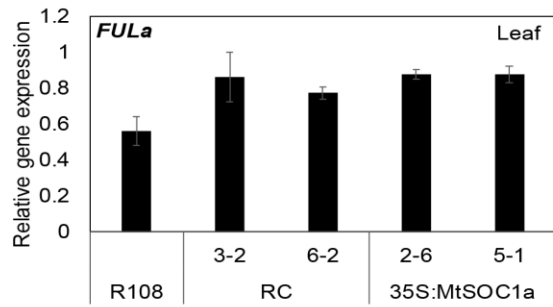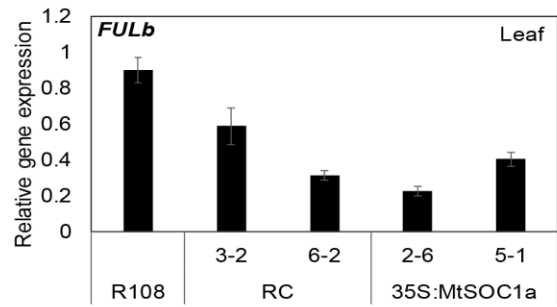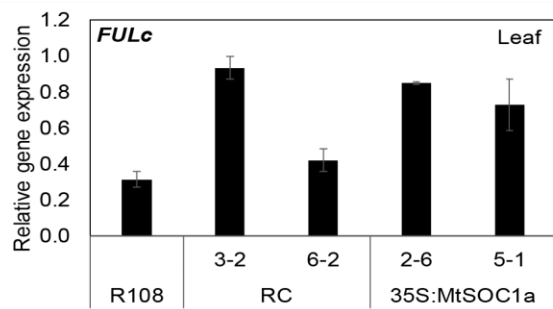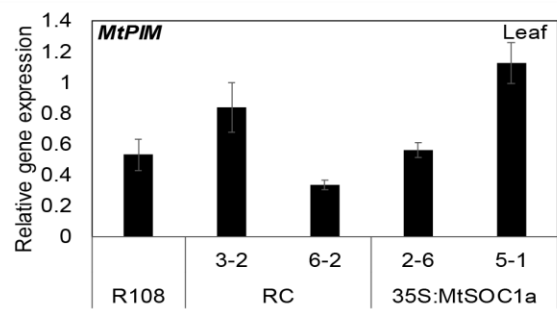



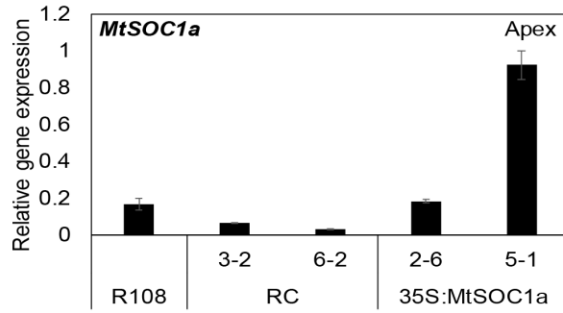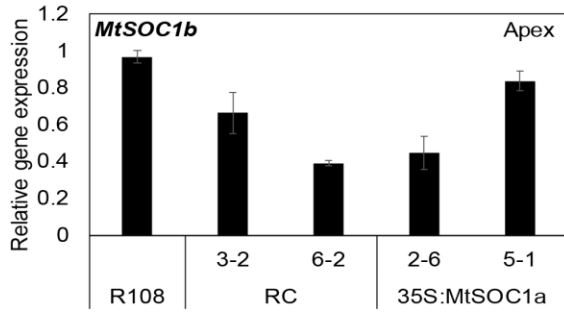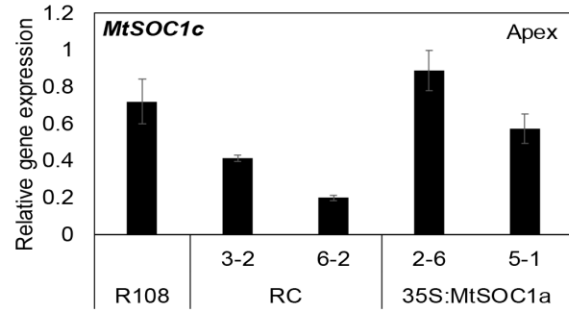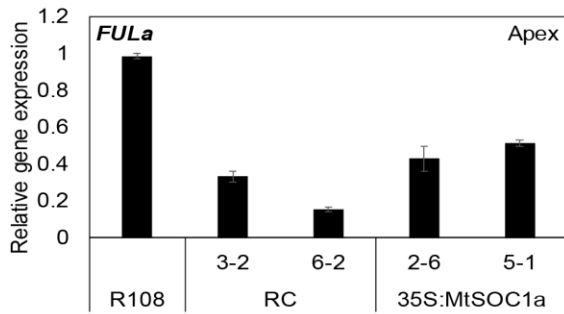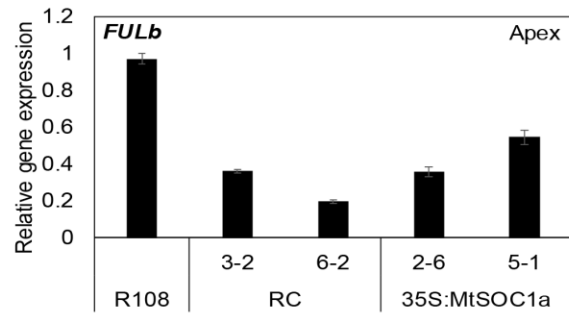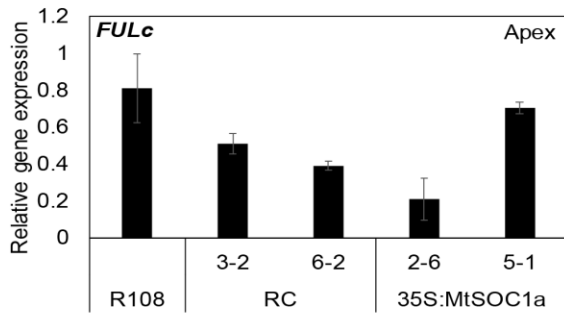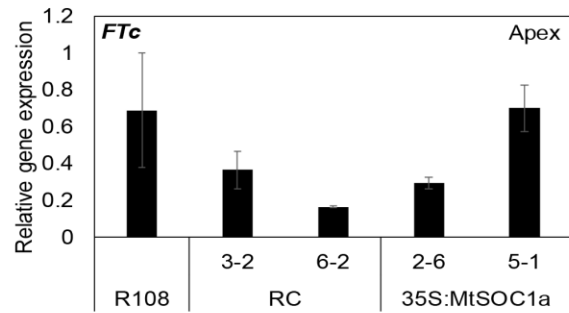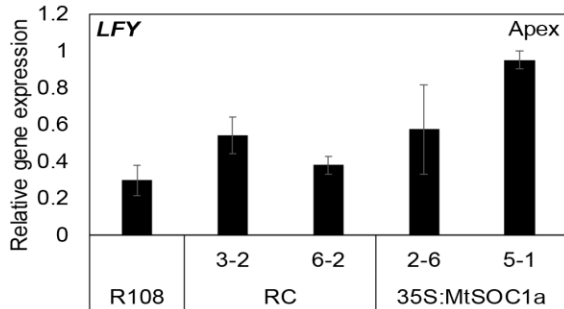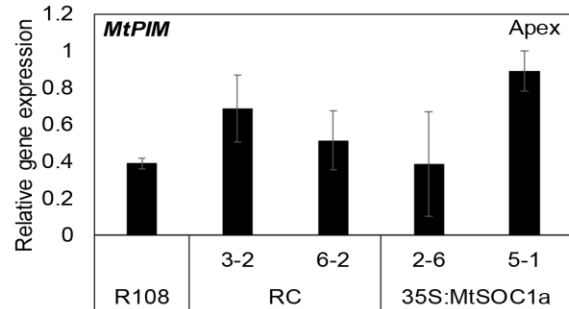

**Supplementary Fig. S9.** Expression of candidate flowering time genes in leaves and apices of T0 *35S:MtSOC1a* transgenic plants. Gene expression was determined using RT-qPCR in the fully expanded trifoliolate leaves (32-40 day-old) and shoot apices (77-86 day-old) of wild type R108, RC and T0 *35S:MtSOC1a* transgenic plants grown in LD. The data are shown as the mean  $\pm$  SE of two-three biological replicates for R108 while two biological replicates for RC and T0 *35S:MtSOC1a* transgenic plants normalized to *PP2A* and presented relative to the highest value. The R108 tissues were harvested at ZT2 while the RC and T0 *35S:MtSOC1a* transgenic plants at ZT4.

**Table S1. List of primers.**

| Gene                                     | Purpose                                                                                                                    | Primer ID                   | Sequence                                                     |
|------------------------------------------|----------------------------------------------------------------------------------------------------------------------------|-----------------------------|--------------------------------------------------------------|
| <i>MtSOC1a</i>                           | <i>Tnt1</i> line genotyping                                                                                                | 1F                          | TGCTGCTGGTAGGTAAGAATCA                                       |
|                                          |                                                                                                                            | 1R                          | CTTCAACAACCATTACGCC                                          |
|                                          | cloning cDNA and genotyping transgenic plants                                                                              | 2F                          | GGGGACAAGTTTGTACAAAAAAGCAGGCTT<br>CGAAACAATGGTGAGAGGAAAGACAC |
|                                          |                                                                                                                            | 2R                          | GGGGACCACCTTTGTACAAGAAAGC<br>TGGGTTCTTCAACTAGACCTGTGAAGTCC   |
|                                          | endogenous <i>MtSOC1a</i> expression in R108 or Total <i>MtSOC1a</i> expression (endogenous + transgene) in overexpression | 3F                          | CGGTTGTTCGAGCAAGAAAGAATCAGGC                                 |
| 3R                                       | GGGGCTGCTTAGAGAGCCTGGCATT                                                                                                  |                             |                                                              |
| <i>MtSOC1b</i>                           | <i>Tnt1</i> line genotyping                                                                                                | 4F                          | TGGAGCCTAAATCAGCCAGT                                         |
|                                          |                                                                                                                            | 4R                          | CGTCAAATTCCTCCCAAAG                                          |
|                                          | cloning cDNA and genotyping transgenic plants                                                                              | 5F                          | GGGGACAAGTTTGTACAAAAAAGCAGGCTT<br>GCTTCCTTTTGTGCTGCA         |
|                                          |                                                                                                                            | 5R                          | GGGGACCACCTTTGTACAAGAAAGCTGGGTT<br>GAGACATTTGCCTCACCT        |
|                                          | expression                                                                                                                 | 6F                          | TCCAGAAACAAGATCAAGGCGCA                                      |
| 6R                                       | TGATGAGACATTTGCCTCACCTT                                                                                                    |                             |                                                              |
| <i>MtSOC1c</i>                           | cloning cDNA and genotyping transgenic plants                                                                              | GW_ <i>MtSOC1c</i> _F       | GGGGACAAGTTTGTACAAAAAAGCAGGCT<br>GAAGTTGCTTTTCTTGCTCA        |
|                                          |                                                                                                                            | GW_ <i>MtSOC1c</i> _R       | GGGGACCACCTTTGTACAAGAAAGCTGGGT<br>CCTCAACTAGCTACACCTTTGG     |
|                                          | expression                                                                                                                 | <i>MtSOC1c</i> -F           | TGCCATGCTCGCAGAGAAGT                                         |
| <i>MtSOC1c</i> -R                        | TCAGTTCCACATCTGAACCTGGACT                                                                                                  |                             |                                                              |
| <i>MtPIM</i>                             | cloning cDNA and genotyping transgenic plants                                                                              | GW_ <i>MtPIM</i> _F         | GGGGACAAGTTTGTACAAA AAGCAGGCT<br>ATGGGAAGGGTAGGTTTCAGTT      |
|                                          |                                                                                                                            | GW_ <i>MtPIM</i> _R         | GGGGACCACCTTTGTACAAGAAAGCTGGGT<br>TCAAAGCATCCAAGATGGCAGG     |
|                                          | expression                                                                                                                 | <i>MtPIM</i> _qRT_F         | GCACAATGGGAGCACCCAAACCA                                      |
|                                          |                                                                                                                            | <i>MtPIM</i> _qRT_R         | GCTTCCTCAGGTAATTGCCACCCA                                     |
| At2g32170                                | expression                                                                                                                 | At2g32170-F                 | TCCTTTTTCATCGACTGC                                           |
|                                          |                                                                                                                            | At2g32170-R                 | CCATATGTGTCCGCAAAATG                                         |
| <i>FTa1</i>                              | expression                                                                                                                 | RT_ <i>FTLa</i> _F          | GTAGCAGTAGGAATCCACTAGC                                       |
|                                          |                                                                                                                            | RT_ <i>FTLa</i> _R2         | ACACTCACTCTCGGTTGATTTCC                                      |
| <i>FTa2</i>                              | expression                                                                                                                 | <i>FTa2</i> -qRT-F          | AAGTGGTAGCAGACCGAATC                                         |
|                                          |                                                                                                                            | <i>FTa2</i> -qRT-R          | CACCACCATTGGTAAC                                             |
| <i>FTc</i>                               | expression                                                                                                                 | <i>FTc</i> -qRT-F           | GTTATGGTGGACGCAGATGC                                         |
|                                          |                                                                                                                            | <i>FTc</i> -qRT-R           | CAAATCGATGAATCCCTGCT                                         |
| <i>FTb1</i>                              | expression                                                                                                                 | <i>FTb1</i> -qRT-F          | ATGAACCCTCTTGTGGTCTG                                         |
|                                          |                                                                                                                            | <i>FTb1</i> -qRT-R          | TGGATTGACTATTTGGGAAG                                         |
| <i>FTb2</i>                              | expression                                                                                                                 | <i>FTb2</i> -qRT-F          | ACAAATCCTCTTGTGTTGG                                          |
|                                          |                                                                                                                            | <i>FTb2</i> -qRT-R          | TGAGTTGATTATTGAGAGG                                          |
| <i>FULa</i>                              | expression                                                                                                                 | <i>MtFULa</i> -TC182438-F   | GGCCCAACTTGAGCAGCAAAATGAGG                                   |
|                                          |                                                                                                                            | <i>MtFULa</i> -TC182438-R   | TGGCGCTTGCCATGGGTTTAC                                        |
| <i>FULb</i>                              | expression                                                                                                                 | 3_ <i>MtMADS5</i> -qRT-F    | AGAGCAGCAAAACTCAAGGCT                                        |
|                                          |                                                                                                                            | 3_ <i>MtMADS5</i> -qRT-R    | AGCTCTTTGAGACCTAAACCTCCAA                                    |
| <i>FULc</i>                              | expression                                                                                                                 | <i>MtFULc</i> _new_F        | AGGGCAAGGACATTCGAGGAGCA                                      |
|                                          |                                                                                                                            | <i>MtFULc</i> _new_R        | TGGTGGTAGCACCTCTGGCTGACAA                                    |
| <i>LFY</i>                               | expression                                                                                                                 | <i>MtLFY</i> -Ex2-F         | CACGTGGCAAAAAGAACGGT                                         |
|                                          |                                                                                                                            | <i>MtLFY</i> -Ex2-R         | TCACCCTGTTCTTAGCAAT                                          |
| <i>AP2</i>                               | expression                                                                                                                 | 1_ <i>MtAP2</i> -Ex9-F      | ATTTTCCACATCTTACCCTCTC                                       |
|                                          |                                                                                                                            | 1_ <i>MtAP2</i> -Ex10-R     | TGCCATTTTGTGATCAGACATT                                       |
| <i>SEP3a</i>                             | expression                                                                                                                 | <i>MtSEP3a</i> -F           | GGAACACTTGCTATGTGAGGCAACA                                    |
|                                          |                                                                                                                            | <i>MtSEP3a</i> -R           | TGGTTTTGACCTGGATGATGGCGT                                     |
| <i>SEP3b</i>                             | expression                                                                                                                 | <i>MtSEP3b</i> -F           | TGGGAAGAGGAAGAGTTGAGT                                        |
|                                          |                                                                                                                            | <i>MtSEP3b</i> -R           | AGAGCAACTTCAGCATCACAA                                        |
| <i>TEM1-like 1</i>                       | expression                                                                                                                 | 1_ <i>MtTEM1</i> -Ex-F      | TTGAGCCGGTTCAGATGTT                                          |
|                                          |                                                                                                                            | 1_ <i>MtTEM1</i> -Ex-R      | TCCATTGCAGAACCACCAA                                          |
| <i>TEM1-like 2</i>                       | expression                                                                                                                 | 2_ <i>MtTEM1</i> -Ex-F      | ATTGGTGTGTCGGTGGTGA                                          |
|                                          |                                                                                                                            | 2_ <i>MtTEM1</i> -Ex-R      | ACCCAAAAAGCCGAACCAT                                          |
| <i>TOE1-like 1</i>                       | expression                                                                                                                 | 1_ <i>MtTOE1</i> -Ex9-F     | TGGCATGTATCCCGCTTTCT                                         |
|                                          |                                                                                                                            | 1_ <i>MtTOE1</i> -Ex10-R    | AGTGACAAGGCCATGAGGTT                                         |
| <i>TOE1-like 2</i>                       | expression                                                                                                                 | 2_ <i>MtTOE1</i> -Ex7-F     | TGTCAAATTCAGACCCCTCT                                         |
|                                          |                                                                                                                            | 2_ <i>MtTOE1</i> -Ex8-R     | CCAGCTTTTTCAAGACGGGT                                         |
| <i>Tnt1</i>                              | <i>Tnt1</i> line genotyping                                                                                                | <i>Tnt1</i> R               | CAGTGAACGAGCAGAACCTGTG                                       |
| $\beta$ -HYD<br>( <i>Medtr2g102570</i> ) | expression                                                                                                                 | <i>Medtr2g102570</i> _Ex1-F | CGTTGGATCCCTCTTGATCAT                                        |
|                                          |                                                                                                                            | <i>Medtr2g102570</i> _Ex2-R | AGCCACATTAGTTTCCCTGCT                                        |
| <i>PP2A</i>                              | expression                                                                                                                 | <i>MPP2A</i> -F             | GTGTTTTGCTTCCGCCGTT                                          |
|                                          |                                                                                                                            | <i>MtPP2A</i> -R            | CCAAATCTTGCTCCCTCATCTG                                       |
